# Supplementary material for: MicroRNA-126 and epidermal growth factor-like domain 7 predict recurrence in patients with colon cancer treated with neoadjuvant chemotherapy
Source: PubMed Central journal article supplement (PMC8992522; doi:10.20517/cdr.2019.08), 2019-09-19
Supplement: cdr-2-885-SupplementaryMaterials.pdf [file cdr-2-885-SupplementaryMaterials.pdf]

## Supplementary

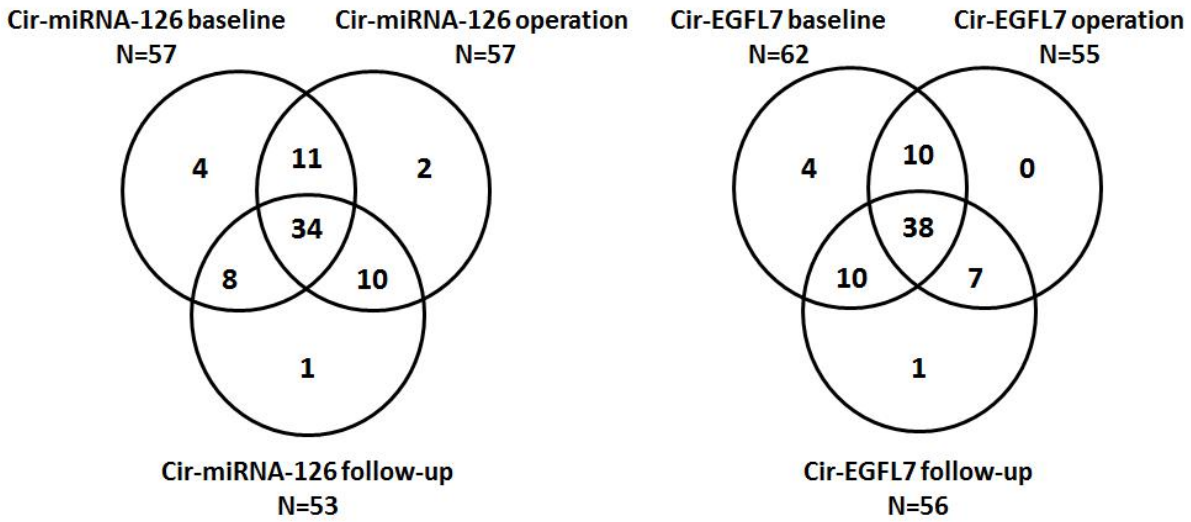

**Supplementary Figure 1.** Blood sample distributions. Patient adherence to the blood sampling varied throughout the trial period and explains why N is not 71 at all the sampling time points

Cir-miRNA-126: Circulating microRNA-126; cir-EGFL7: Circulating epidermal growth factor like domain 7.

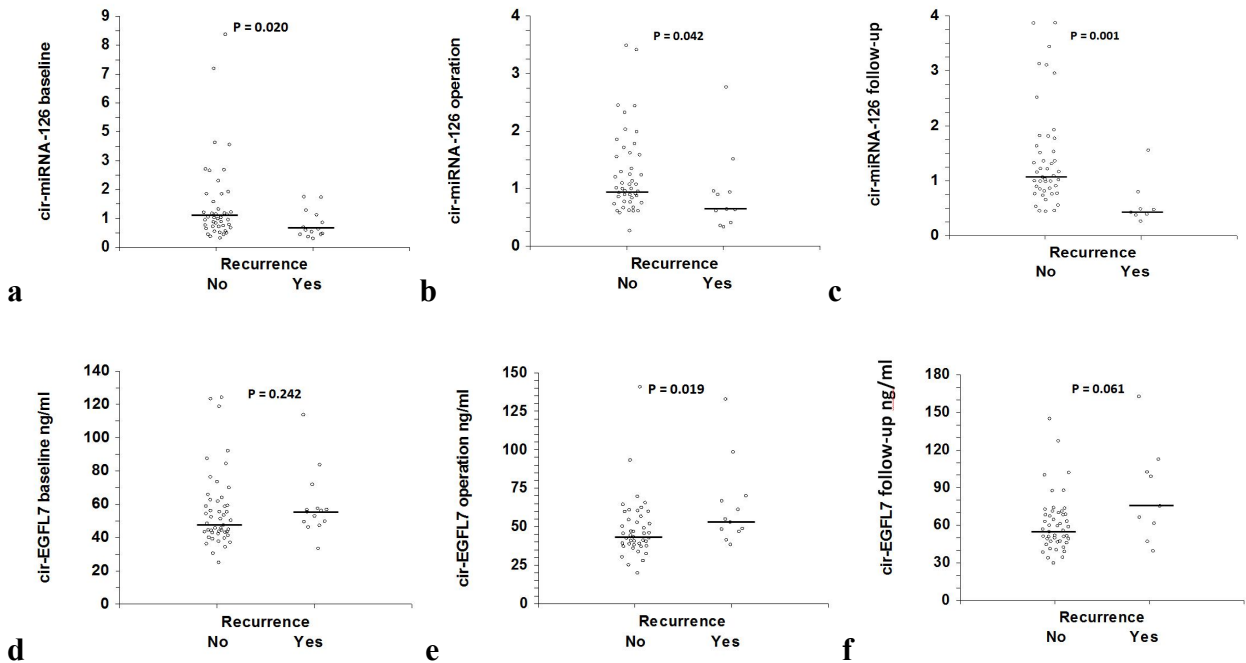

**Supplementary Figure 2.** Dot plots illustrating the results from microRNA-126 (miRNA-126) **a-c**, and epidermal growth factor-like domain 7 (EGFL7) **d-f** analyses according to recurrence status, at baseline, operation, and follow-up, respectively

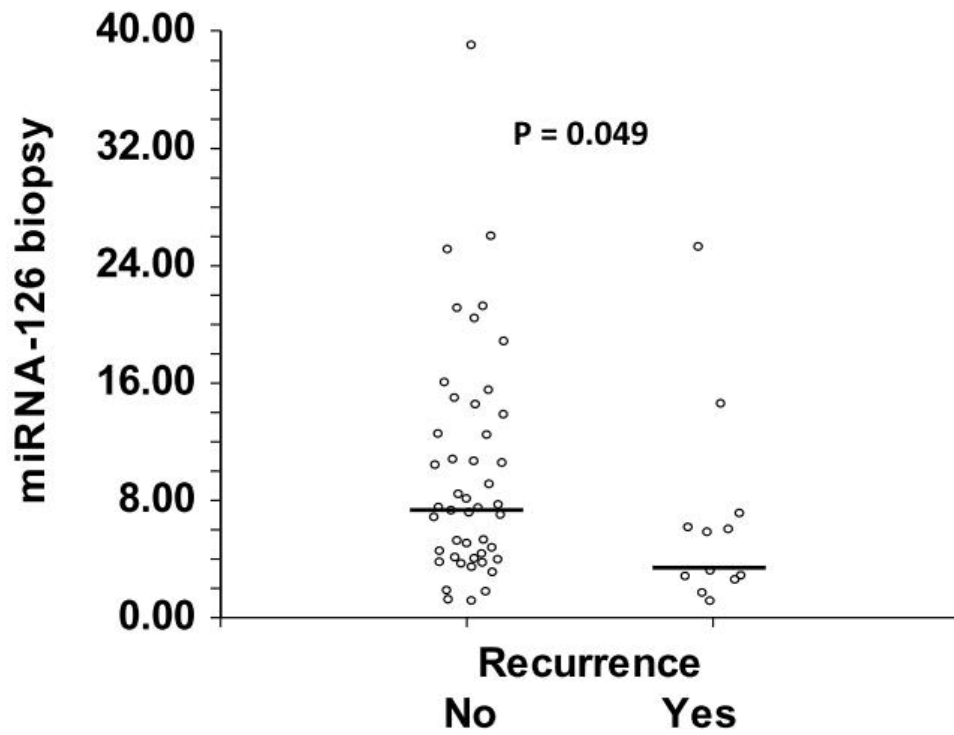

**Supplementary Figure 3.** Dot plot illustrating the expression levels of microRNA-126 (miRNA-126) in the diagnostic biopsies according to recurrence status

**Supplementary Table 1. MicroRNA-126 according to clinical characteristics**

| Characteristics           | Baseline |                  |                | before operation |                  |                | Follow-up |                  |                |
|---------------------------|----------|------------------|----------------|------------------|------------------|----------------|-----------|------------------|----------------|
|                           | N        | Median (95% CI)  | <i>p</i> value | N                | Median (95% CI)  | <i>p</i> value | N         | Median (95% CI)  | <i>p</i> value |
| <b>Gender</b>             |          |                  |                |                  |                  |                |           |                  |                |
| Male                      | 30       | 0.97 (0.70-1.35) | 0.570          | 29               | 0.78 (0.55-1.08) | 0.228          | 27        | 0.90 (0.65-1.33) | 0.247          |
| Female                    | 27       | 1.10 (0.77-1.32) |                | 28               | 0.90 (0.78-1.09) |                | 26        | 1.08 (0.89-1.53) |                |
| <b>Age (years)</b>        |          |                  |                |                  |                  |                |           |                  |                |
| > Mean                    | 29       | 1.06 (0.59-1.77) | 0.756          | 24               | 0.73 (0.55-0.96) | 0.106          | 24        | 0.80 (0.65-1.06) | <b>0.027</b>   |
| ≤ Mean                    | 28       | 1.04 (0.59-1.77) |                | 33               | 0.87 (0.78-1.32) |                | 29        | 1.16 (0.99-1.51) |                |
| <b>T category</b>         |          |                  |                |                  |                  |                |           |                  |                |
| T3 ETI > 5 mm             | 47       | 0.99 (0.80-1.25) | 0.476          | 50               | 0.84 (0.76-0.99) | 0.458          | 46        | 1.01 (0.79-1.22) | 0.563          |
| T4                        | 10       | 1.39 (0.49-2.98) |                | 7                | 0.82 (0.23-1.77) |                | 7         | 1.15 (0.55-2.95) |                |
| <b>Localization</b>       |          |                  |                |                  |                  |                |           |                  |                |
| Right                     | 33       | 1.06 (0.80-1.32) | 0.728          | 31               | 0.84 (0.65-1.17) | 0.689          | 31        | 0.98 (0.76-1.31) | 0.206          |
| Left                      | 24       | 1.04 (0.62-1.35) |                | 26               | 0.81 (0.67-1.05) |                | 22        | 1.09 (0.81-1.55) |                |
| <b>ECOG PS</b>            |          |                  |                |                  |                  |                |           |                  |                |
| 0                         | 30       | 1.12 (0.77-1.48) | 1.000          | 29               | 0.84 (0.73-1.31) | 0.844          | 26        | 1.01 (0.85-1.22) | 0.936          |
| 1                         | 17       | 1.06 (0.75-1.77) |                | 21               | 0.88 (0.53-1.17) |                | 19        | 1.21 (0.73-1.35) |                |
| <b>Mutations</b>          |          |                  |                |                  |                  |                |           |                  |                |
| <i>KRAS</i>               |          |                  |                |                  |                  |                |           |                  |                |
| wild-type                 | 41       | 1.10 (0.77-1.32) | 0.702          | 43               | 0.83 (0.73-0.99) | 0.293          | 39        | 1.01 (0.81-1.22) | 0.275          |
| mutated                   | 12       | 0.82 (0.59-1.94) |                | 11               | 0.88 (0.56-1.62) |                | 10        | 0.85 (0.42-1.51) |                |
| Unknown                   | 4        | 0.96             |                | 3                | 0.67             |                | 4         | 1.30             |                |
| <i>BRAF</i>               |          |                  |                |                  |                  |                |           |                  |                |
| wild-type                 | 36       | 1.01 (0.70-1.35) | 0.885          | 41               | 0.81 (0.67-1.05) | 0.232          | 37        | 1.09 (0.90-1.35) | 0.164          |
| mutated                   | 15       | 1.06 (0.77-1.43) |                | 12               | 0.97 (0.79-1.38) |                | 10        | 0.79 (0.47-2.51) |                |
| Unknown                   | 6        | 0.96 (0.55-3.99) |                | 4                | 0.77             |                | 6         | 1.11 (0.45-3.10) |                |
| <i>PIK3CA</i>             |          |                  |                |                  |                  |                |           |                  |                |
| wild-type                 | 39       | 0.99 (0.70-1.27) | 0.157          | 44               | 0.80 (0.73-1.08) | 0.538          | 37        | 1.03 (0.86-1.35) | 0.191          |
| mutated                   | 10       | 1.32 (0.72-4.08) |                | 7                | 0.94 (0.53-1.74) |                | 8         | 0.92 (0.26-1.22) |                |
| Unknown                   | 8        | 0.96 (0.55-1.96) |                | 6                | 0.85 (0.65-1.32) |                | 8         | 1.11 (0.37-1.55) |                |
| <i>KRAS, BRAF, PIK3CA</i> |          |                  |                |                  |                  |                |           |                  |                |
| All wild-type             | 21       | 0.93 (0.62-1.35) | 0.596          | 27               | 0.75 (0.55-0.84) | <b>0.024</b>   | 24        | 1.12 (0.79-1.63) | 0.138          |
| Mutated                   | 29       | 1.06 (0.77-1.36) |                | 25               | 0.96 (0.82-1.38) |                | 22        | 0.88 (0.65-1.22) |                |
| Unknown                   | 7        | 1.06 (0.55-3.99) |                | 5                | 0.87             |                | 7         | 1.15 (0.45-3.10) |                |

CI: Confidence Interval; ECOG PS: Eastern Cooperative Oncology Group performance status; ETI: Extramural tumor invasion; N: Number

Median values for patients with unknown mutational status are presented but are not included in the analyses.

Confidence intervals are not calculated for cases with less than six individuals

**Supplementary Table 2. EGFL7 according to clinical characteristics (ng/ml)**

| Characteristics           | Baseline |                  |                | before operation |                  |                | Follow-up |                   |                |
|---------------------------|----------|------------------|----------------|------------------|------------------|----------------|-----------|-------------------|----------------|
|                           | N        | Median (95% CI)  | <i>p</i> value | N                | Median (95% CI)  | <i>p</i> value | N         | Median (95% CI)   | <i>p</i> value |
| <b>Gender</b>             |          |                  |                |                  |                  |                |           |                   |                |
| Male                      | 34       | 51.5 (46.1-56.5) | 0.475          | 28               | 48.5 (41.3-59.9) | 0.170          | 29        | 64.5 (51.0-71.0)  | 0.110          |
| Female                    | 28       | 51.6 (42.2-58.6) |                | 27               | 45.6 (38.7-51.8) |                | 27        | 54.6 (45.8-61.1)  |                |
| <b>Age (years)</b>        |          |                  |                |                  |                  |                |           |                   |                |
| > Mean                    | 31       | 51.1 (43.0-59.1) | 0.833          | 23               | 47.0 (39.1-61.1) | 0.556          | 26        | 60.5 (49.0-68.6)  | 0.954          |
| ≤ Mean                    | 31       | 52.8 (45.6-56.1) |                | 32               | 45.6 (40.6-51.8) |                | 30        | 59.0 (49.7-69.8)  |                |
| <b>T category</b>         |          |                  |                |                  |                  |                |           |                   |                |
| T3 ETI > 5 mm             | 52       | 51.7 (45.6-56.1) | 0.871          | 48               | 46.9 (42.6-52.7) | 0.067          | 49        | 61.1 (51.6-68.2)  | 0.511          |
| T4                        | 10       | 52.2 (36.1-87.4) |                | 7                | 37.1 (25.0-62.4) |                | 7         | 50.8 (29.7-87.8)  |                |
| <b>Localization</b>       |          |                  |                |                  |                  |                |           |                   |                |
| Right                     | 35       | 51.1 (44.4-56.5) | 0.701          | 29               | 49.0 (38.0-59.9) | 0.893          | 31        | 55.8 (49.0-68.2)  | 0.767          |
| Left                      | 27       | 53.3 (44.3-58.7) |                | 26               | 46.3 (41.1-51.8) |                | 25        | 61.4 (51.3-69.8)  |                |
| <b>ECOG PS</b>            |          |                  |                |                  |                  |                |           |                   |                |
| 0                         | 32       | 49.0 (43.5-53.3) | 0.079          | 29               | 41.3 (38.3-46.7) | <b>0.032</b>   | 30        | 57.7 (49.0-64.5)  | 0.314          |
| 1                         | 20       | 56.3 (44.8-69.8) |                | 19               | 50.3 (42.6-61.1) |                | 17        | 67.2 (51.6-71.0)  |                |
| <b>Mutations</b>          |          |                  |                |                  |                  |                |           |                   |                |
| <i>KRAS</i>               |          |                  |                |                  |                  |                |           |                   |                |
| wild-type                 | 46       | 50.7 (44.1-56.1) | 0.916          | 41               | 48.3 (42.4-54.5) | 0.401          | 43        | 61.4 (50.8-68.2)  | 0.623          |
| mutated                   | 12       | 47.9 (44.8-63.9) |                | 11               | 41.3 (37.0-59.9) |                | 9         | 51.0 (46.5-100.0) |                |
| Unknown                   | 4        | 71.5             |                | 3                | 44.4             |                | 4         | 64.6              |                |
| <i>BRAF</i>               |          |                  |                |                  |                  |                |           |                   |                |
| wild-type                 | 40       | 52.0 (46.1-56.7) | 0.144          | 39               | 46.8 (41.1-56.6) | 0.698          | 37        | 56.7 (49.0-68.6)  | 0.740          |
| mutated                   | 16       | 47.0 (37.6-56.1) |                | 12               | 47.8 (35.9-54.8) |                | 13        | 61.1 (49.0-75.2)  |                |
| Unknown                   | 6        | 56.0 (39.0-87.4) |                | 4                | 40.9             |                | 6         | 59.6 (47.0-127.1) |                |
| <i>PIK3CA</i>             |          |                  |                |                  |                  |                |           |                   |                |
| wild-type                 | 44       | 49.5 (44.4-56.1) | 0.664          | 42               | 47.8 (41.3-56.6) | 0.368          | 40        | 60.0 (49.0-68.2)  | 0.729          |
| mutated                   | 10       | 53.8 (44.1-59.1) |                | 7                | 45.6 (35.9-54.8) |                | 8         | 53.3 (42.2-72.6)  |                |
| Unknown                   | 8        | 56.0 (39.0-84.3) |                | 6                | 45.2 (33.7-66.7) |                | 8         | 64.8 (47.0-127.1) |                |
| <i>KRAS, BRAF, PIK3CA</i> |          |                  |                |                  |                  |                |           |                   |                |
| All wild-type             | 25       | 54.2 (43.4-62.6) | 0.472          | 25               | 52.7 (42.4-60.9) | 0.174          | 25        | 62.8 (47.2-71.0)  | 0.865          |
| Mutated                   | 30       | 50.4 (44.8-56.0) |                | 25               | 45.6 (39.1-51.8) |                | 24        | 55.2 (49.0-66.2)  |                |
| Unknown                   | 7        | 53.3 (39.0-87.4) |                | 5                | 44.4             |                | 7         | 59.8 (47.0-162.5) |                |

CI: Confidence Interval; ECOG PS: Eastern Cooperative Oncology Group performance status; ETI: Extramural tumor invasion; N: Number

Median values for patients with unknown mutational status are presented but are not included in the analyses.

Confidence intervals are not calculated for cases with less than six individuals

**Supplementary Table 3. EGFL7 according to pato-anatomical characteristics (ng/ml)**

| Characteristics                | Baseline |                  |         | before operation |                   |         | follow-up |                   |         |
|--------------------------------|----------|------------------|---------|------------------|-------------------|---------|-----------|-------------------|---------|
|                                | N        | Median (95% CI)  | p value | N                | Median (95% CI)   | p value | N         | Median (95% CI)   | p value |
| <b>Perforation</b>             |          |                  |         |                  |                   |         |           |                   |         |
| Yes                            | 6        | 54.1 (43.4-61.7) | 0.840   | 8                | 47.7 (38.0-60.0)  | 0.858   | 6         | 67.2 (40.3-101.8) | 0.289   |
| No                             | 56       | 50.7 (45.5-56.5) |         | 47               | 45.9 (41.1-52.8)  |         | 50        | 57.7 (50.7-64.5)  |         |
| <b>Fixation</b>                |          |                  |         |                  |                   |         |           |                   |         |
| Yes                            | 18       | 54.1 (43.0-58.6) | 0.593   | 15               | 42.4 (38.9-59.9)  | 0.484   | 12        | 70.4 (59.3-87.8)  | 0.076   |
| No                             | 44       | 50.7 (45.6-56.7) |         | 40               | 47.7 (42.6-54.5)  |         | 44        | 55.2 (49.7-62.8)  |         |
| <b>Histology</b>               |          |                  |         |                  |                   |         |           |                   |         |
| Adenocarcinoma                 | 47       | 54.2 (45.6-56.7) | 0.565   | 45               | 46.8 (42.4-54.5)  | 0.284   | 42        | 60.2 (49.7-68.2)  | 0.437   |
| Mucinous                       | 11       | 48.4 (41.1-61.7) |         | 7                | 41.3 (19.8-93.2)  |         | 10        | 53.1 (47.0-64.5)  |         |
| Other <sup>a</sup>             | 4        | 43.3             |         | 3                | 43.2              |         | 3         | 78.0              |         |
| <b>Malignancy grade</b>        |          |                  |         |                  |                   |         |           |                   |         |
| 1+2                            | 34       | 55.7 (45.5-58.7) | 0.064   | 35               | 48.6 (42.6-56.6)  | 0.207   | 34        | 58.0 (46.9-67.2)  | 0.206   |
| 3                              | 19       | 45.6 (41.1-52.2) |         | 11               | 40.8 (25.0-60.9)  |         | 12        | 63.7 (51.3-87.3)  |         |
| Not evaluable                  | 9        | 52.8 (40.0-69.8) |         | 9                | 45.6 (37.1-51.8)  |         | 10        | 56.6 (47.0-127.1) |         |
| <b>Perineural invasion</b>     |          |                  |         |                  |                   |         |           |                   |         |
| Yes                            | 8        | 54.7 (33.3-76.3) | 0.622   | 6                | 46.5 (41.1-132.9) | 0.395   | 5         | 66.2              | 0.954   |
| No                             | 54       | 49.9 (45.4-56)   |         | 49               | 46.7 (40.8-52.7)  |         | 51        | 59.3 (51.0-67.2)  |         |
| <b>Tumor budding</b>           |          |                  |         |                  |                   |         |           |                   |         |
| Yes                            | 9        | 53.3 (45.5-57.4) | 0.983   | 8                | 51.9 (40.6-66.7)  | 0.139   | 7         | 69.8 (51.6-102.3) | 0.050   |
| No                             | 51       | 51.1 (44.8-56.5) |         | 45               | 45.9 (40.4-52.7)  |         | 48        | 56.3 (49.0-63.0)  |         |
| Not evaluable                  | 2        | 49.2             |         | 2                | 43.2              |         | 1         | 72.6              |         |
| <b>MSI status</b>              |          |                  |         |                  |                   |         |           |                   |         |
| MSI                            | 17       | 48.4 (41.1-59.1) | 0.477   | 13               | 43.2 (32.3-60.4)  | 0.306   | 12        | 57.9 (47.0-75.2)  | 0.823   |
| MSS                            | 42       | 52.5 (46.1-56.5) |         | 40               | 47.6 (42.6-52.8)  |         | 41        | 61.4 (51.3-68.2)  |         |
| Not evaluable                  | 3        | 51.1             |         | 2                | 39.1              |         | 3         | 45.8              |         |
| <b>pT category<sup>b</sup></b> |          |                  |         |                  |                   |         |           |                   |         |
| pT <sub>0</sub>                | 1        | 84.3             |         | 2                | 44.6              |         | 2         | 92.9              |         |
| pT <sub>1</sub>                | 0        |                  |         | 0                |                   |         | 0         |                   |         |
| pT <sub>2</sub>                | 9        | 51.1 (44.4-73.4) | 0.384   | 9                | 42.6 (38.7-64.4)  | 0.481   | 9         | 51.0 (38.3-68.6)  | 0.361   |
| pT <sub>3</sub>                | 44       | 49.5 (45.5-57.4) |         | 36               | 46.3 (40.6-52.7)  |         | 39        | 59.3 (49.7-68.2)  |         |
| pT <sub>4</sub>                | 8        | 54.1 (24.9-56.5) |         | 8                | 47.7 (38.9-61.1)  |         | 6         | 64.6 (41.0-100.0) |         |
| <b>pN category<sup>c</sup></b> |          |                  |         |                  |                   |         |           |                   |         |
| pN <sub>0</sub>                | 41       | 51.1 (44.4-55.3) |         | 36               | 45.0 (38.7-50.3)  |         | 38        | 59.2 (50.8-68.2)  |         |
| pN <sub>1</sub>                | 13       | 47.3 (42.8-71.8) | 0.582   | 14               | 50.9 (40.8-66.7)  | 0.072   | 12        | 49.3 (40.3-102.3) | 0.833   |
| pN <sub>2</sub>                | 8        | 57.6 (33.3-69.8) |         | 5                | 46.8              |         | 6         | 66.2 (46.5-112.4) |         |
| <b>Converted</b>               |          |                  |         |                  |                   |         |           |                   |         |
| Yes                            | 29       | 47.1 (43.5-55.3) | 0.265   | 26               | 43.4 (38.0-51.8)  | 0.056   | 29        | 54.6 (49.0-67.2)  | 0.367   |
| No                             | 33       | 55.3 (47.3-58.7) |         | 29               | 48.6 (42.6-60.4)  |         | 27        | 62.8 (46.9-71.0)  |         |

CI: Confidence Interval; MSI: Microsatellite instability; MSS: Microsatellite stable; N: Number

Confidence intervals are not calculated for cases with less than six individuals

<sup>a</sup>Other includes three low differentiated adenocarcinomas and one small cell/neuroendocrine carcinoma

<sup>b</sup>P-value refer to the comparison pT<sub>4</sub> versus pT<sub>0-3</sub>

<sup>c</sup>P-value refer to the comparison pN<sub>0</sub> versus pN<sub>1-2</sub>
